# Supplementary material
Source: PubMed Central journal article supplement (PMC5665024)
Supplement: NIHMS915709-supplement-2.pdf [file NIHMS915709-supplement-2.pdf]

Supplemental data for  
Honokiol inhibits DNA polymerases  $\beta$  and  $\lambda$  and increases BLM  
sensitivity of human cancer cells

*A. S. Prakasha Gowda<sup>†</sup>, Zucui Suo<sup>‡</sup>, and Thomas E Spratt<sup>†\*</sup>*

<sup>†</sup>Department of Biochemistry and Molecular Biology, Milton S. Hershey Medical Center,  
Pennsylvania State University College of Medicine, Hershey, Pennsylvania 17033

<sup>‡</sup>Department of Chemistry and Biochemistry, The Ohio State University, Columbus, Ohio, USA.

**Table of Figures**

|                                                                                                                                            |     |
|--------------------------------------------------------------------------------------------------------------------------------------------|-----|
| Figure S1. Initial rates plots of incorporation of dCTP opposite dG.....                                                                   | S2  |
| Figure S2. Plot of $V_{\max}^{\text{app}}$ and $K_m^{\text{app}}$ versus honokiol concentration.....                                       | S3  |
| Figure S3. Lineweaver-Burk plots for the incorporation of dCTP opposite dG.....                                                            | S4  |
| Figure S4. Reduced burst amplitudes in the presence of honokiol for (A) pol $\beta$ and (B) pol $\lambda$ . .....                          | S5  |
| Figure S5. Cell viability for GM12787 cells as function of honokiol and (A and B) temozolomide or (C and D) bleomycin concentrations. .... | S6  |
| Figure S6. Cell viability for A549 cells as function of honokiol and (A and B) temozolomide or (C and D) bleomycin concentrations. ....    | S7  |
| Figure S7. Cell viability for MCF7 cells as function of honokiol and (A and B) temozolomide or (C and D) bleomycin concentrations. ....    | S8  |
| Figure S8. Cell viability for PANC1 cells as function of honokiol and (A and B) temozolomide or (C and D) bleomycin concentrations. ....   | S9  |
| Figure S9. Cell viability for UACC903 cells as function of honokiol and (A and B) temozolomide or (C and D) bleomycin concentrations. .... | S10 |
| Figure S10. Modeling of the HNL inhibition of pol $\beta$ .....                                                                            | S11 |

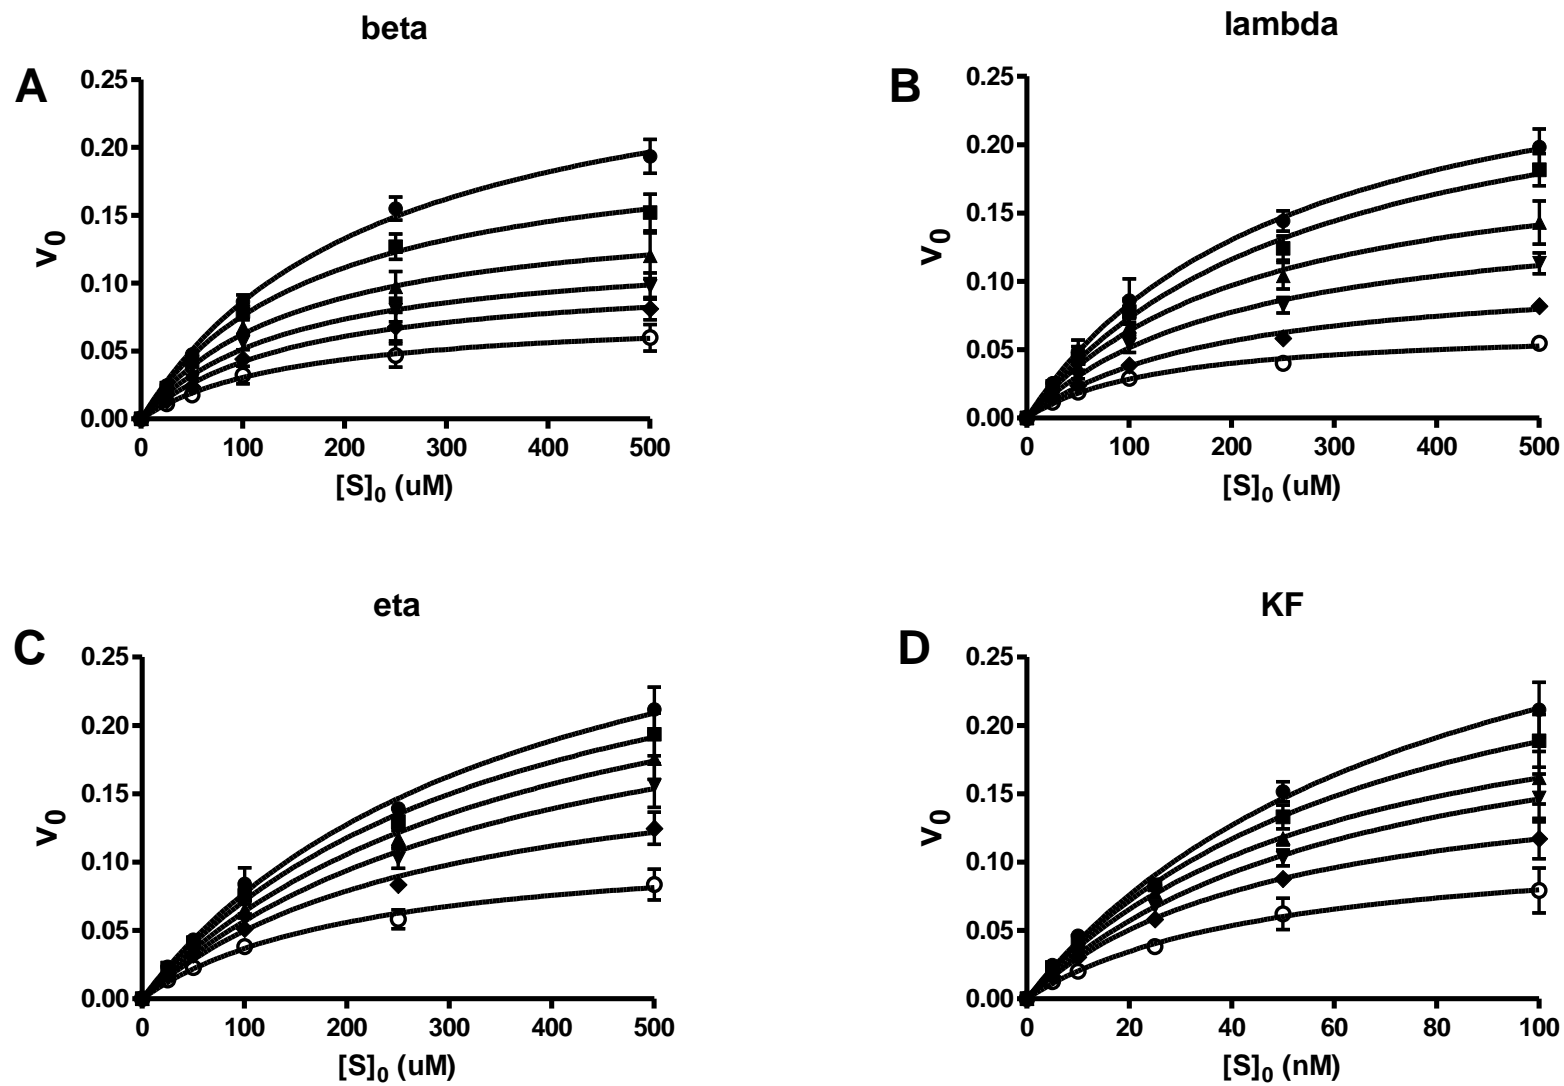

Figure S1 Initial rates plots of incorporation of dCTP opposite dG with 0 (open circle), 1, (diamond), 2 (down triangle), 5 (up triangle), 10 (square), 20 (circle)  $\mu\text{M}$  honokiol for (A) pol  $\beta$ , (B) pol  $\lambda$ , (C) pol  $\eta$ , and (D) Kf(exo-). The error bars are the SEM of three independent experiments. The lines are the nonlinear least-squares fit to  $v_0 = \frac{v_{max}^{app}[S]_0}{K_m^{app} + [S]_0}$

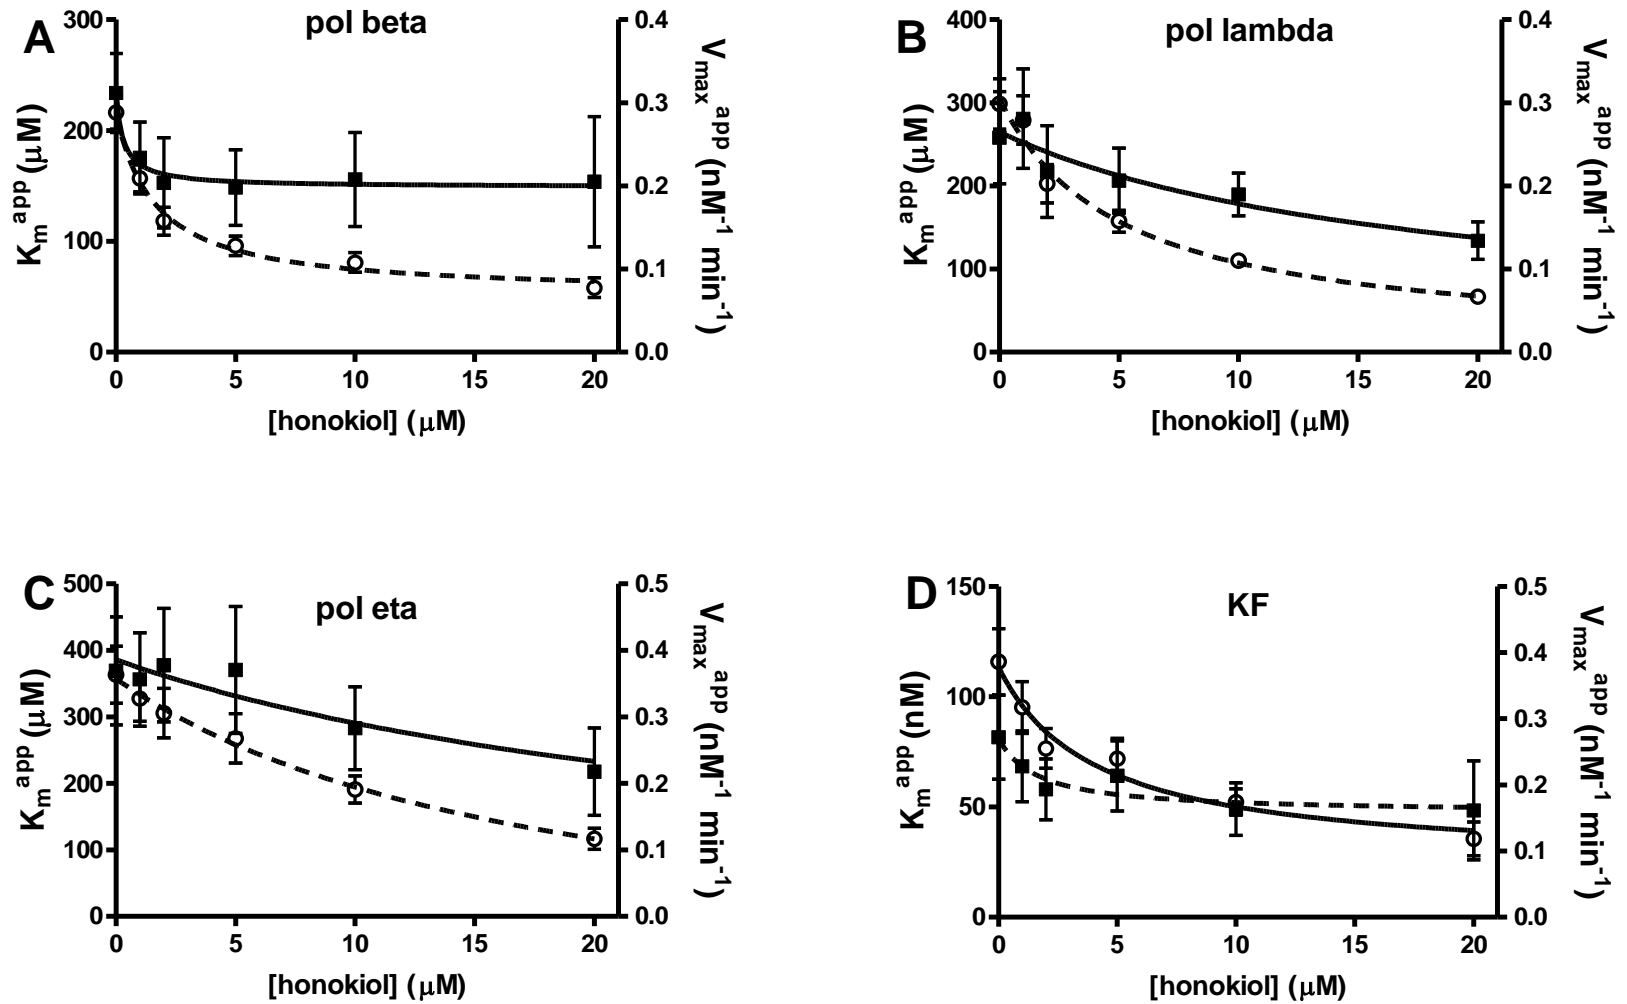

Figure S2. Plot of  $V_{max}^{app}$  and  $K_m^{app}$  versus honokiol concentration for the incorporation of the correct dNTP in to the DNA substrate for (A) pol  $\beta$ , (B) pol  $\lambda$ , (C) pol  $\eta$ , and (D) Kf(exo-). The data points  $V_{max}^{app}$  (circle) and  $K_m^{app}$  (square) are the mean  $\pm$  SD of three determinations. The lines are the best fit of the data to equations below.

$$V_{max}^{app} = V_{max} \frac{\beta[I] + \alpha K_i}{[I] + \alpha K_i}$$

$$K_m^{app} = \alpha K_s \frac{[I] + K_i}{[I] + \alpha K_i} \quad (4)$$

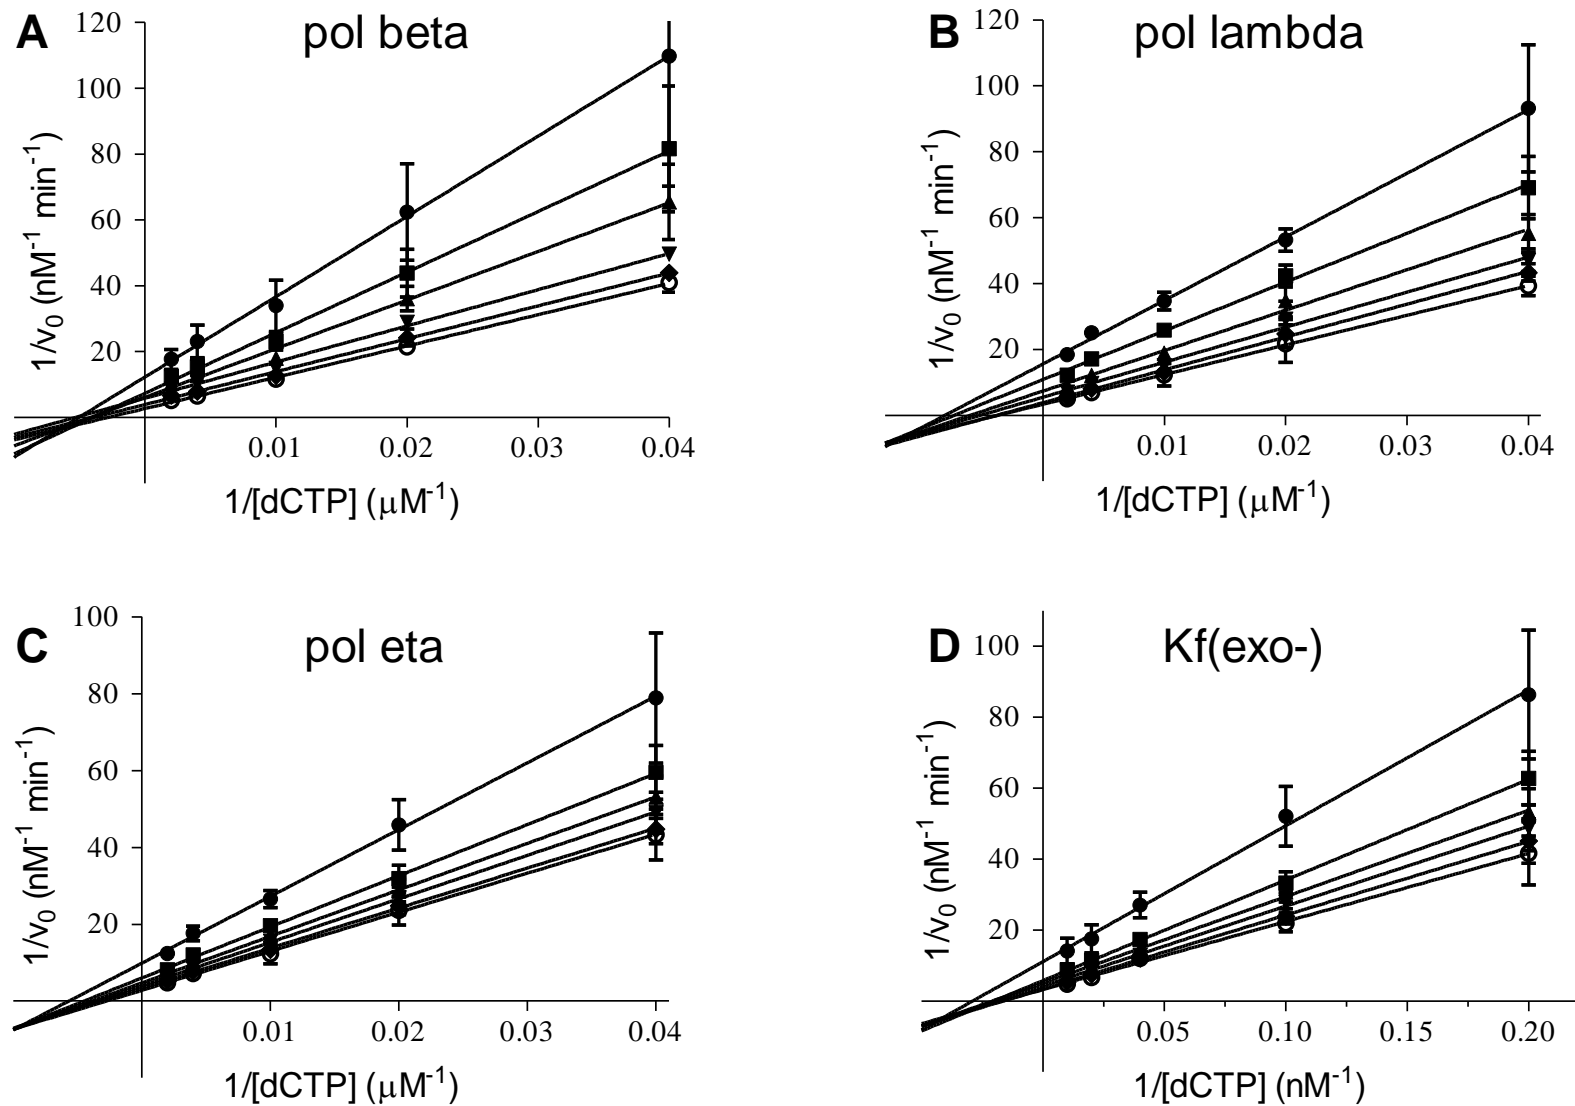

Figure S3. Lineweaver-Burk plots for the incorporation of dCTP opposite dG with 0 (O), 1, (diamond), 2 (down triangle), 5 (up triangle), 10 (square), 20 (circle)  $\mu\text{M}$  honokiol for (A) pol  $\beta$ , (B) pol  $\lambda$ m (C) pol  $\beta$ , And (D) Kf(exo-). The error bars are the SD of three independent experiments. The lines are the linear least-squares fit to the data.

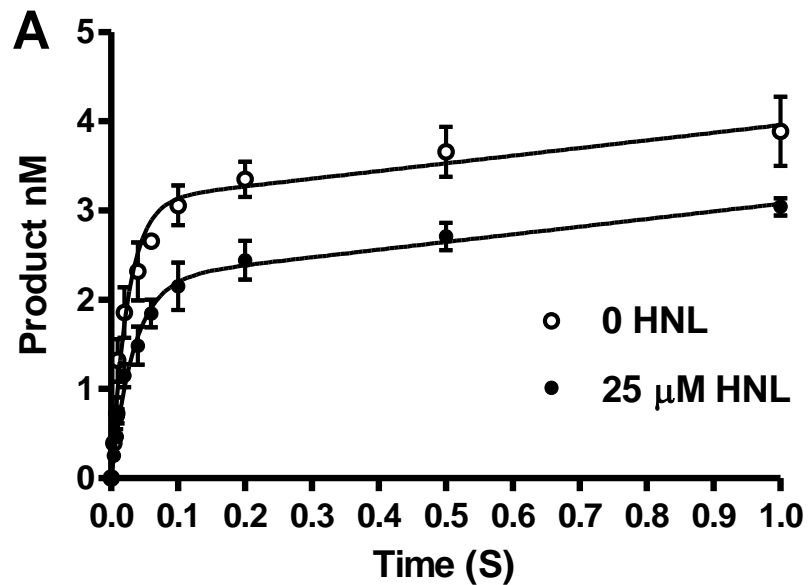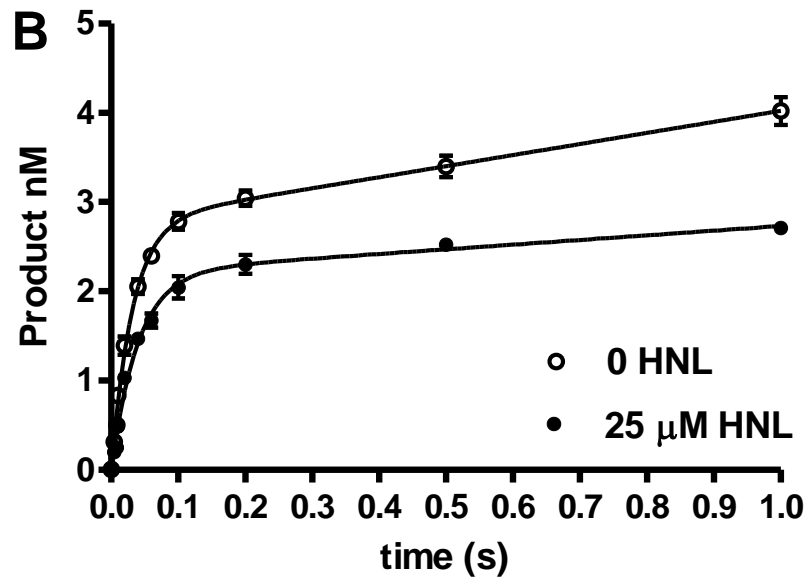

Figure S4. Reduced burst amplitudes in the presence of honokiol for (A) pol  $\beta$  and (B) pol  $\lambda$ . Time course for the insertion of 500  $\mu\text{M}$  dCTP opposite dG in the presence of 0 (open circle) and 25 (solid circle)  $\mu\text{M}$  honokiol with 10 nM DNA and 4 nM polymerase. The lines are the best fit to the burst equation. The data points are the mean  $\pm$  SEM of three experiments.

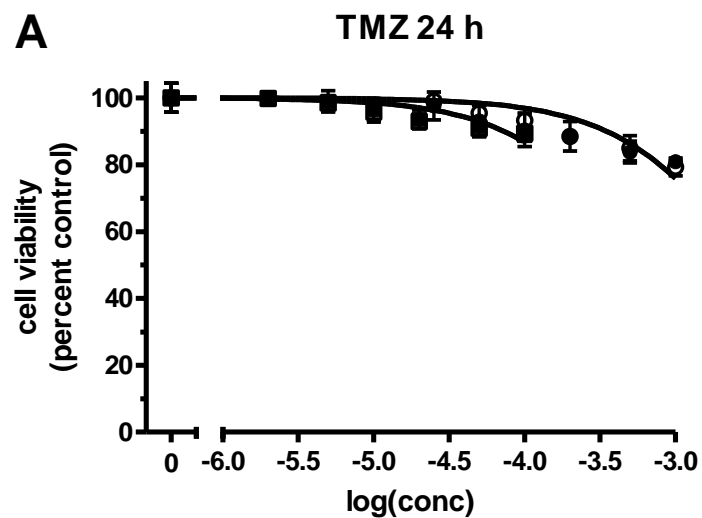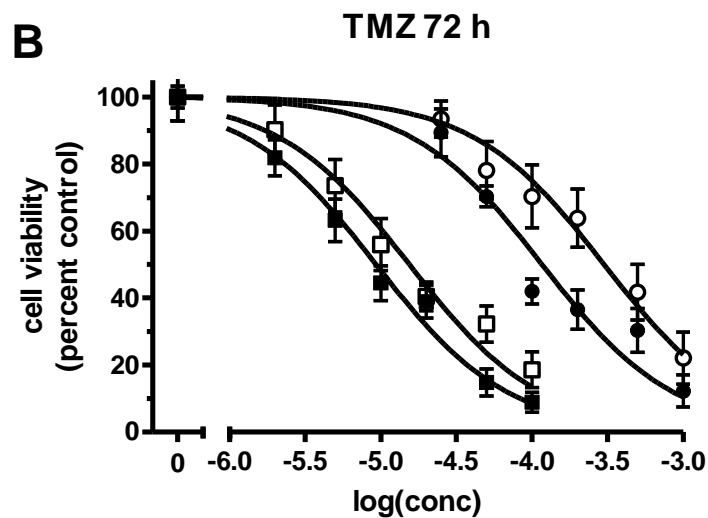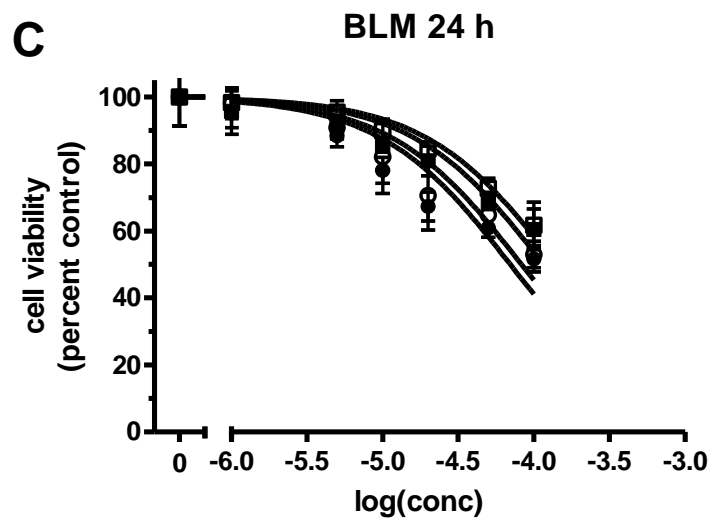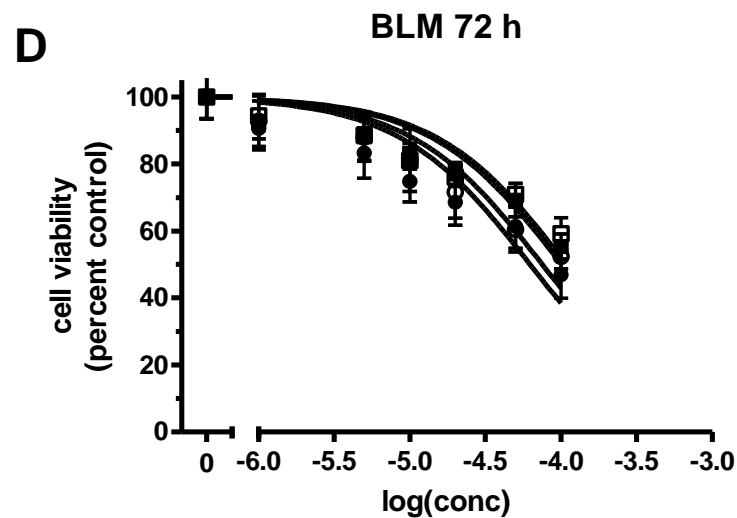

Figure S5. Cell viability for GM12787 cells as function of honokiol and (A and B) temozolomide or (C and D) bleomycin concentrations. The absorbance readings were normalized. Cell viability was determined 24 and 72 hours after treatment. A and B, TMZ (open circle), TMZ + 10  $\mu$ M HNL(solid circle), HNL(open square) HNL + 25  $\mu$ M TMZ (solid square). A and B, BLM (open circle), BLM + 10  $\mu$ M HNL(solid circle), HNL(open square) HNL + 25  $\mu$ M BLM (solid square).

The markers represent the mean  $\pm$  SEM of three experiments. The lines are the best fit to  $Y = \frac{100}{1+10^{(\log IC_{50}-\log(X))}}$ .

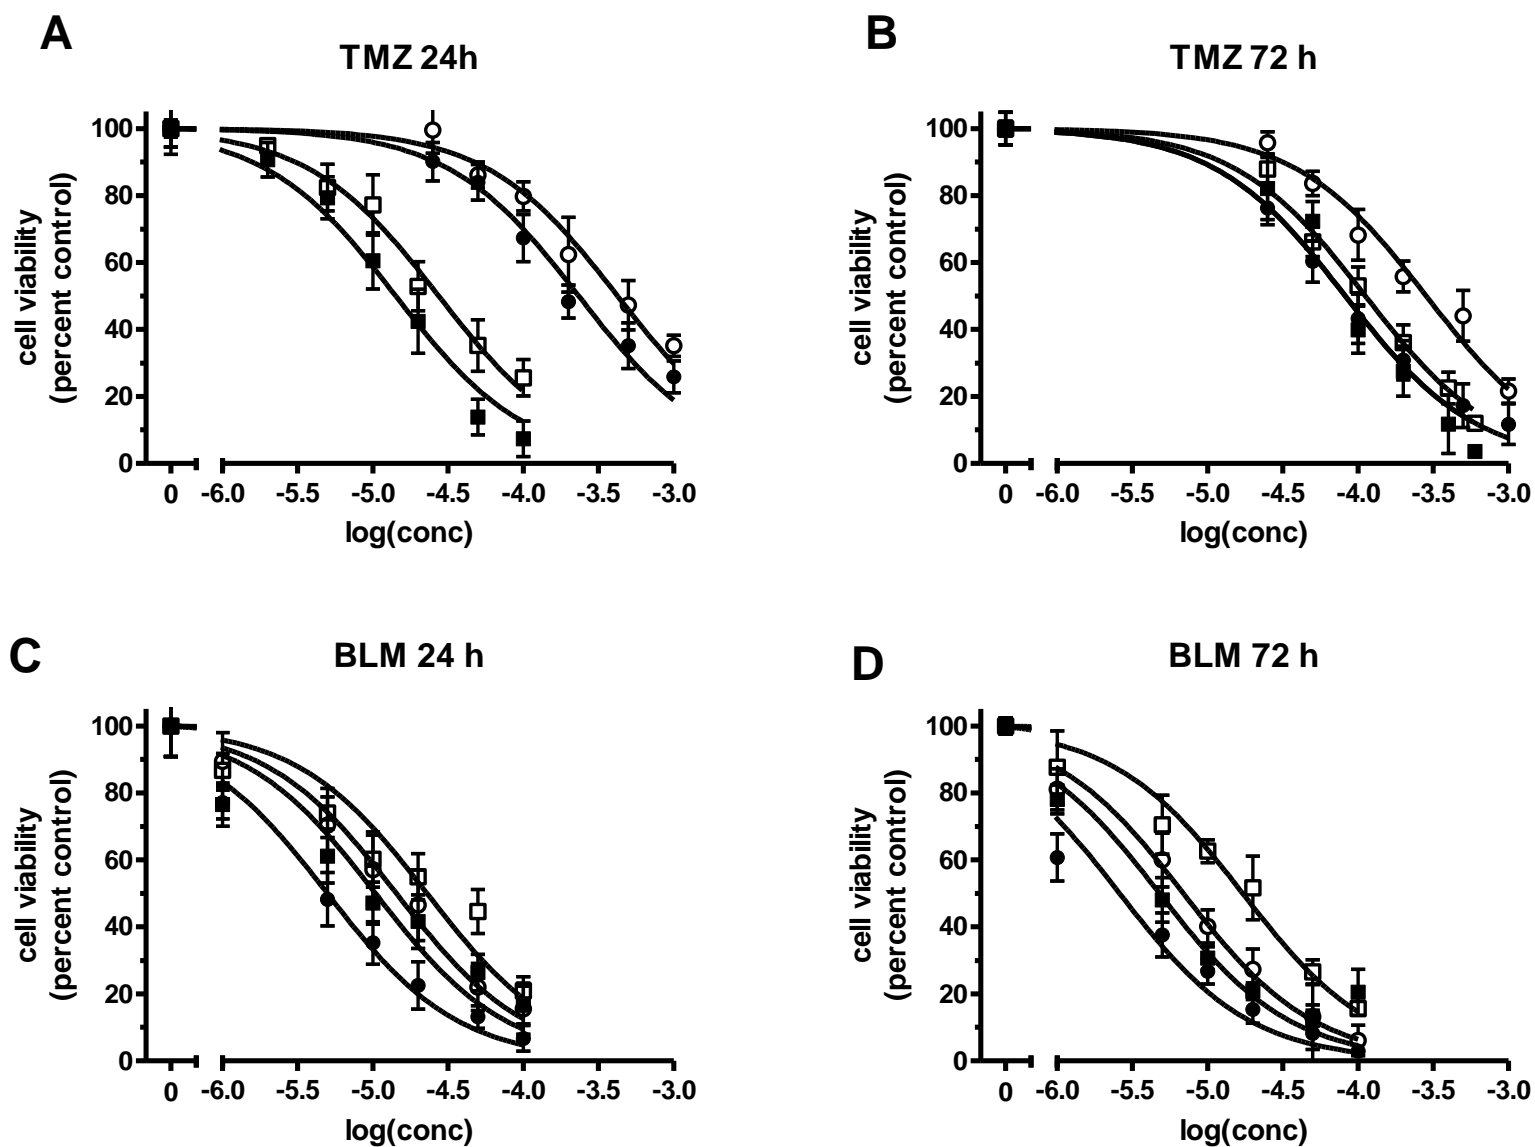

Figure S6. Cell viability for A549 cells as function of honokiol and (A and B) temozolomide or (C and D) bleomycin concentrations. The absorbance readings were normalized. Cell viability was determined 24 and 72 hours after treatment. A and B, TMZ (open circle), TMZ + 10  $\mu$ M HNL(solid circle), HNL(open square) HNL + 25  $\mu$ M TMZ (solid square). A and B, BLM (open circle), BLM + 10  $\mu$ M HNL(solid circle), HNL(open square) HNL + 25  $\mu$ M BLM (solid square). The markers represent the mean  $\pm$  SEM of three experiments. The lines are the best fit to  $Y = \frac{100}{1+10^{(\log IC_{50}-\log(X))}}$ .

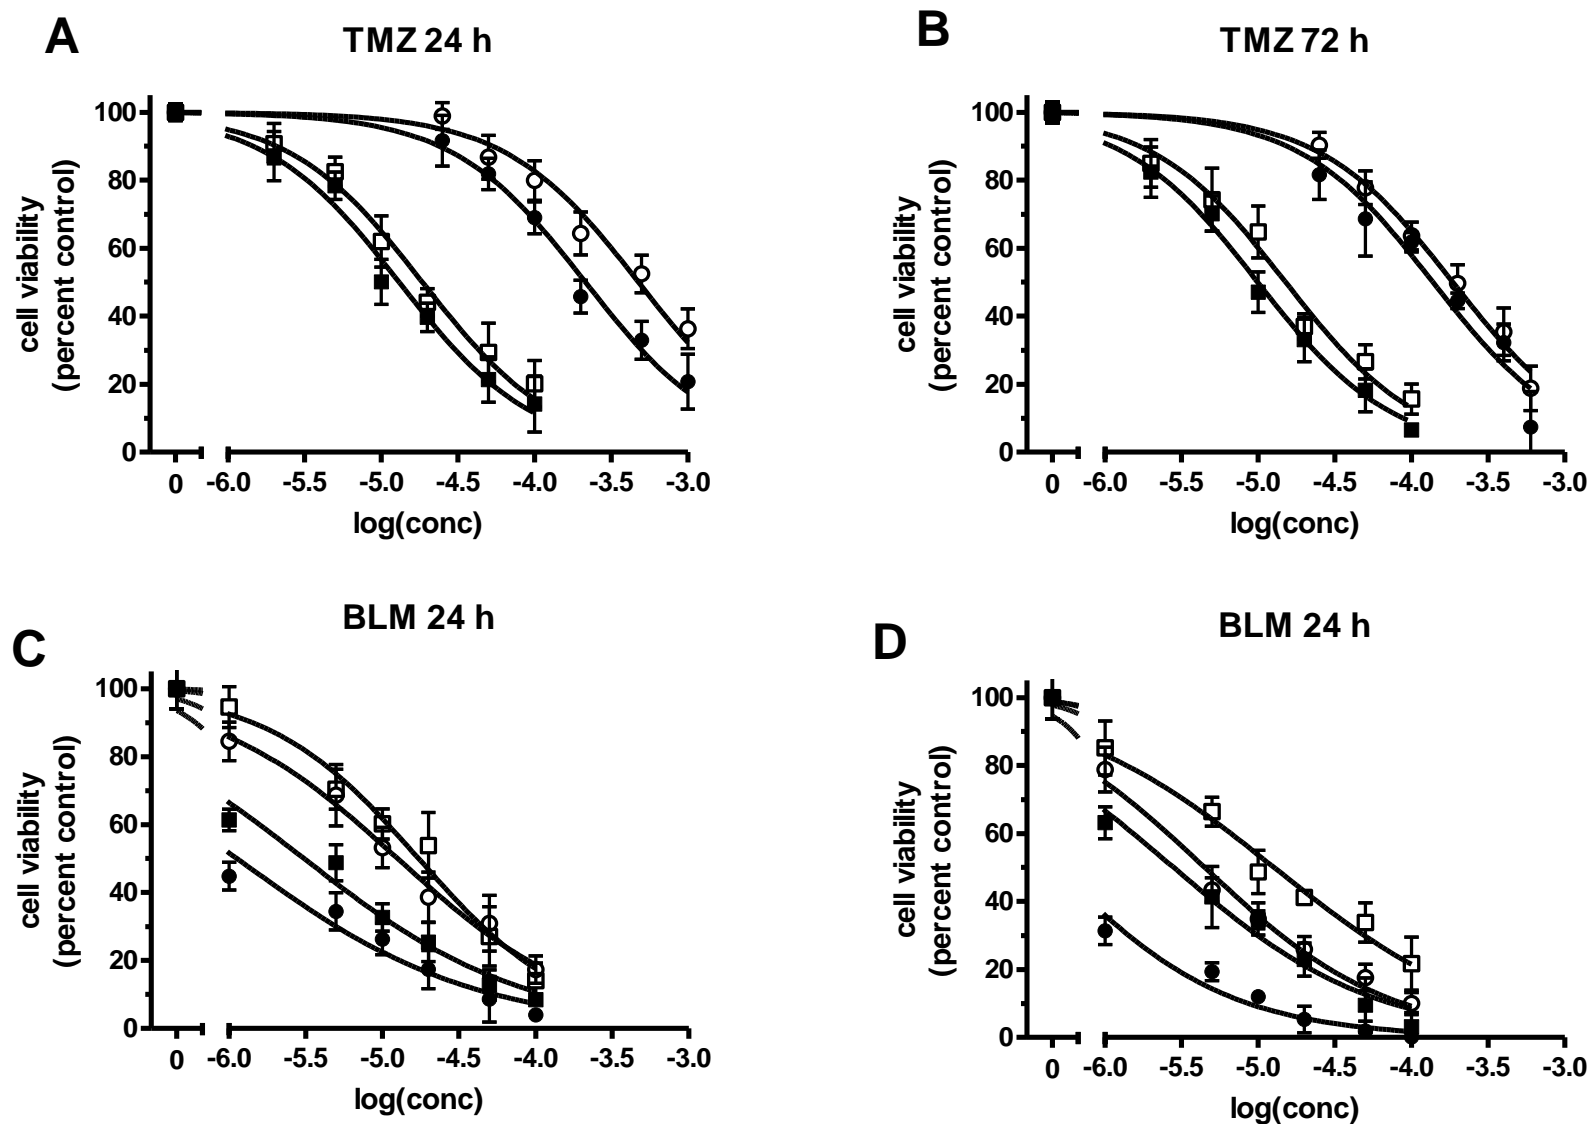

Figure S7. Cell viability for MCF7 cells as function of honokiol and (A and B) temozolomide or (C and D) bleomycin concentrations. The absorbance readings were normalized. Cell viability was determined 24 and 72 hours after treatment. A and B, TMZ (open circle), TMZ + 10  $\mu$ M HNL(solid circle), HNL(open square) HNL + 25  $\mu$ M TMZ (solid square). A and B, BLM (open circle), BLM + 10  $\mu$ M HNL(solid circle), HNL(open square) HNL + 25  $\mu$ M BLM (solid square).

The markers represent the mean  $\pm$  SEM of three experiments. The lines are the best fit to  $Y = \frac{100}{1+10^{(\log IC_{50}-\log(X))}}$ .



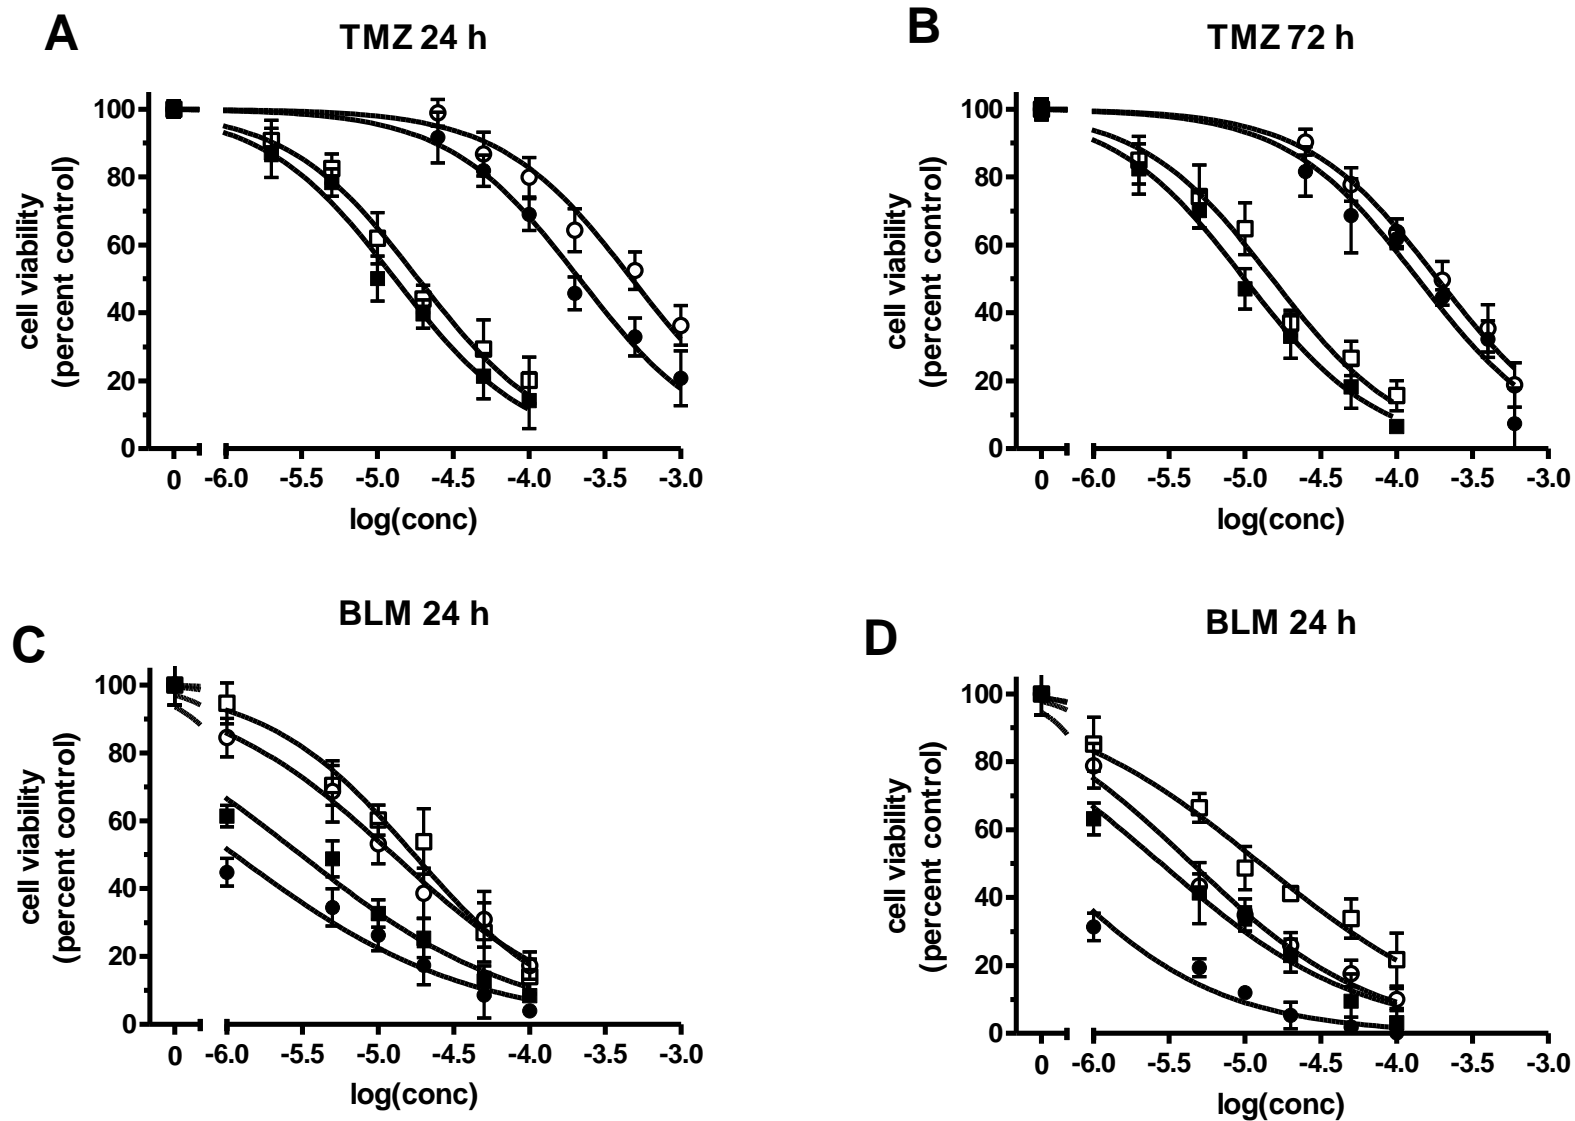

Figure S8. Cell viability for PANC1 cells as function of honokiol and (A and B) temozolomide or (C and D) bleomycin concentrations. The absorbance readings were normalized. Cell viability was determined 24 and 72 hours after treatment. A and B, TMZ (open circle), TMZ + 10  $\mu$ M HNL(solid circle), HNL(open square) HNL + 25  $\mu$ M TMZ (solid square). A and B, BLM (open circle), BLM + 10  $\mu$ M HNL(solid circle), HNL(open square) HNL + 25  $\mu$ M BLM (solid square).

The markers represent the mean  $\pm$  SEM of three experiments. The lines are the best fit to  $Y = \frac{100}{1+10^{(\log IC_{50}-\log(X))}}$ .

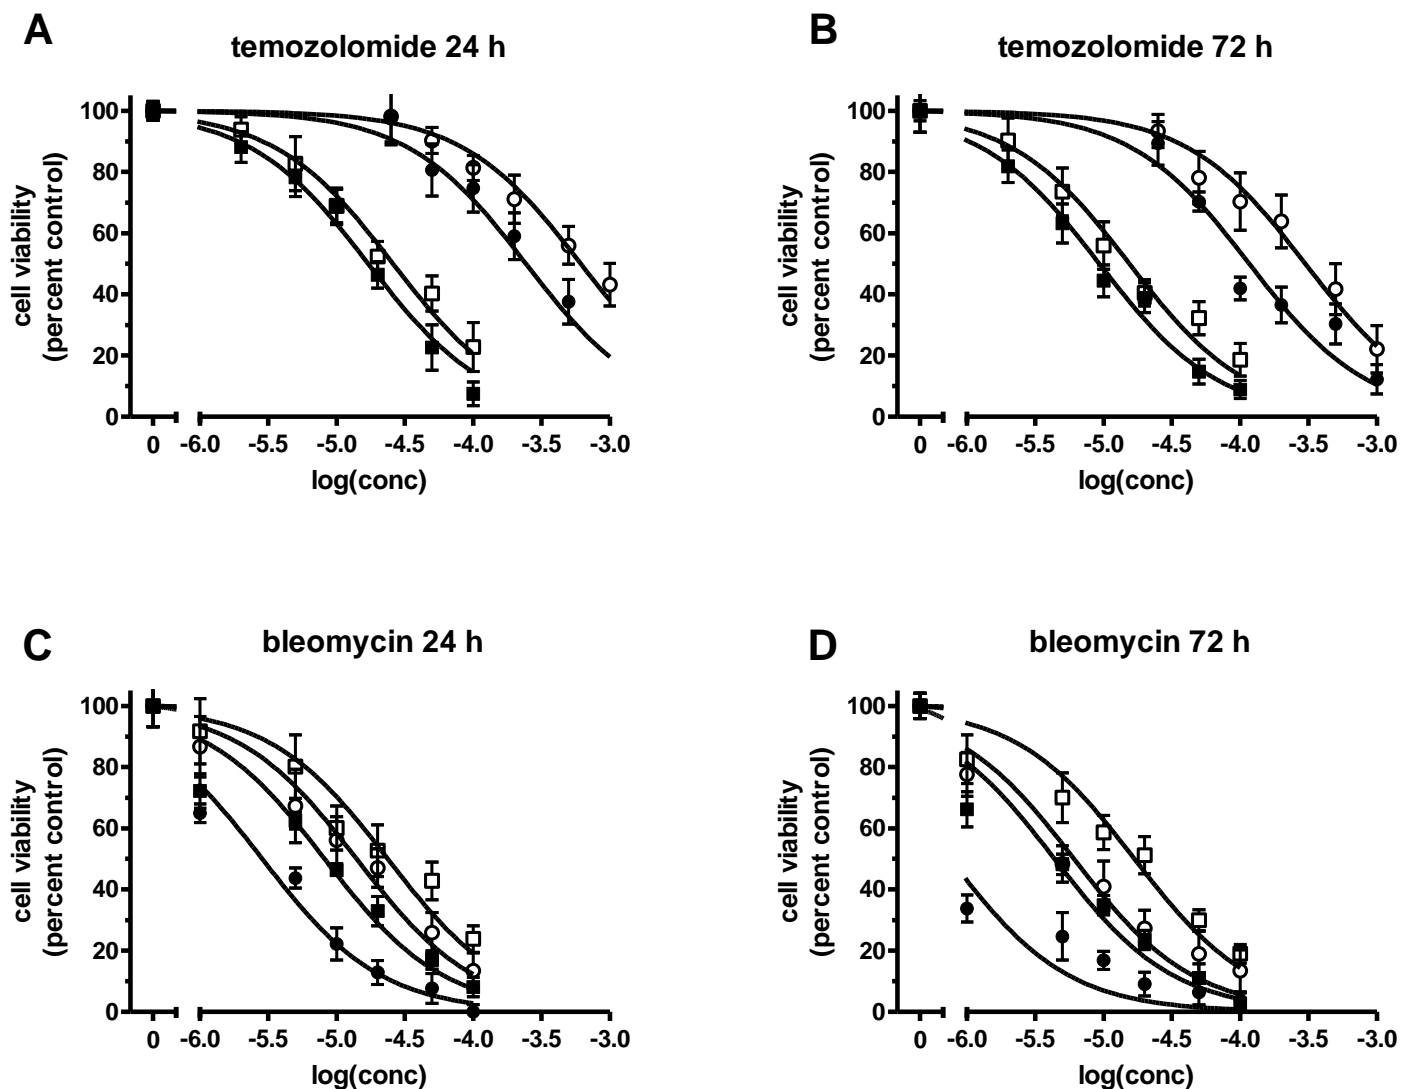

Figure S9. Cell viability for UACC903 cells as function of honokiol and (A and B) temozolomide or (C and D) bleomycin concentrations. The absorbance readings were normalized. Cell viability was determined 24 and 72 hours after treatment. A and B, TMZ (open circle), TMZ + 10  $\mu$ M HNL(solid circle), HNL(open square) HNL + 25  $\mu$ M TMZ (solid square). A and B, BLM (open circle), BLM + 10  $\mu$ M HNL(solid circle), HNL(open square) HNL + 25  $\mu$ M BLM (solid square).

The markers represent the mean  $\pm$  SEM of three experiments. The lines are the best fit to  $Y = \frac{100}{1+10^{(\log IC_{50}-\log(X))}}$ .

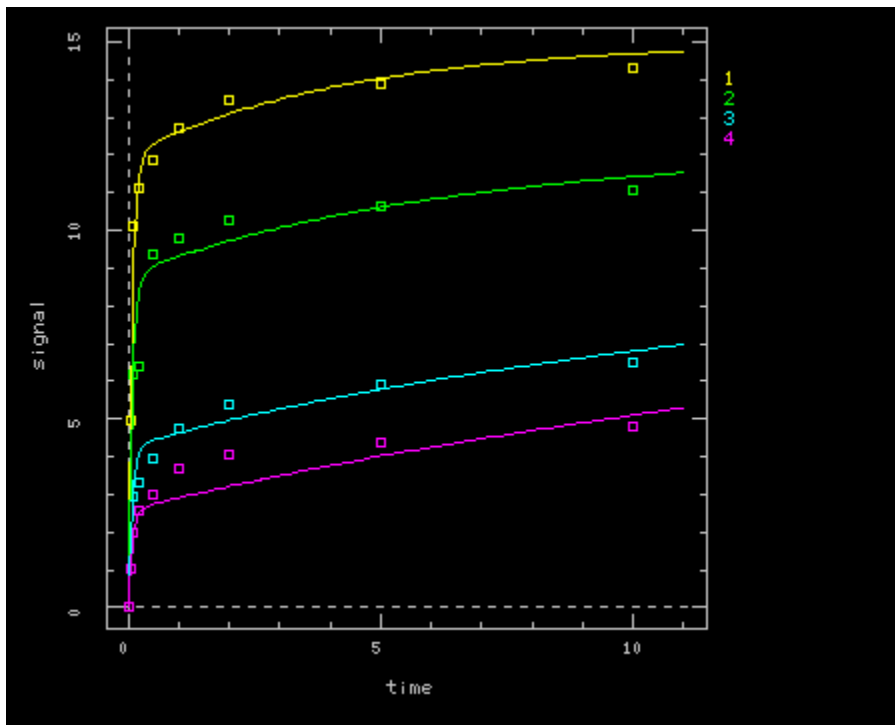

Figure S10. Modeling of the HNL inhibition of pol  $\beta$

DynaFit V4 was used to fit the honokiol inhibition of the pol  $\beta$  catalyzed dNTP incorporation to a simplified form of Scheme 1, in which  $\alpha = 1$  and  $\beta = 0$ .

Initial Parameters

$k_1 = 0.01?$ ,  $k_{-1} = 0.1$   
 $k_2 = 1$ ,  $k_{-2} = 20000$   
 $k_3 = 18$ ,  
 $k_4 = 0.001?$ ,  $k_{-4} = 0.01?$

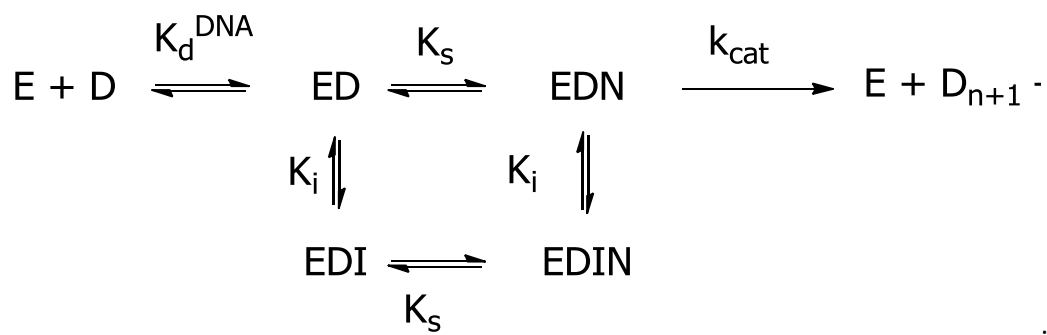

## Dynafit Script

```
-----  
; DNA polymerase beta Honokiol Inhibition  
; time course  
: inactive complex  
;-----
```

### [task]

```
task = fit  
data = progress  
model = pol non-competitive
```

### [mechanism]

```
E + D <=> ED      : k1 k-1  
ED + N <=> EDN    : k2 k-2  
EDN --> E + P    : k3  
ED + I <=> EDI    : k4 k-4  
EDN + I <=> EDNI  : k4 k-4  
EDI + N <=> EDNI  : k2 k-2
```

### [constants]

```
k1 = 0.01?,    k-1 = 0.1  
k2 = 1 ,      k-2 = 20000  
k3 = 18,  
k4 = 0.001?,  k-4 = 0.01?
```

### [responses]

```
P = 1
```

### [data]

```
directory ./honokiol  
extension txt  
file h00 | equilibrate E = 300, D = 30, I = 0, dilute 0.5 | concentration N = 50000  
file h01 | equilibrate E = 300, D = 30, I = 20000, dilute 0.5 | concentration N = 50000  
file h05 | equilibrate E = 300, D = 30, I = 100000, dilute 0.5 | concentration N = 50000  
file h10 | equilibrate E = 300, D = 30, I = 200000, dilute 0.5 | concentration N = 50000
```

### [output]

```
directory ./honokiol/output
```
